# Supplementary material for: Inhibitory effect of Zhujing Pill on myopia progression: Mechanistic insights based on metabonomics and network pharmacology
Source: PubMed Central journal article supplement (PMC11614212; doi:10.1371/journal.pone.0312379), 2024-12-03
Supplement: pone.0312379.s002.pdf [file pone.0312379.s002.pdf]

Fig 6B LPCAT1-1

Marker: 60KDa —

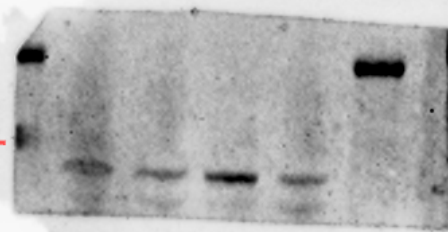

NC LIM ZJP NS

Fig 6B LPCAT1-2

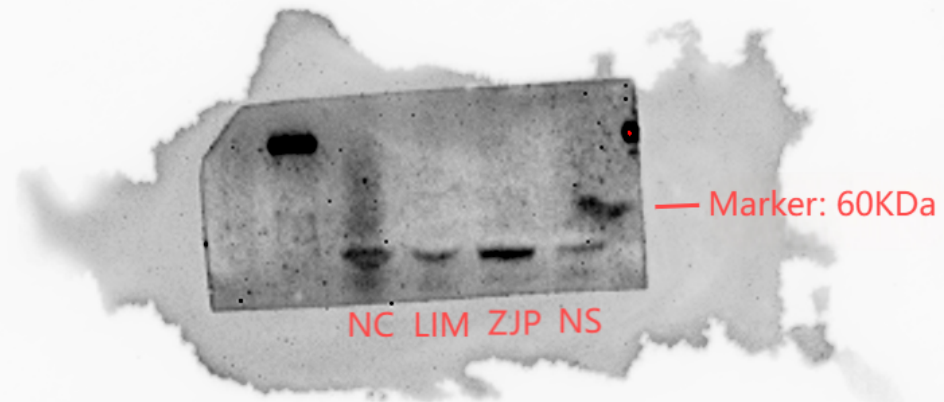

Fig 6B LPCAT1-3

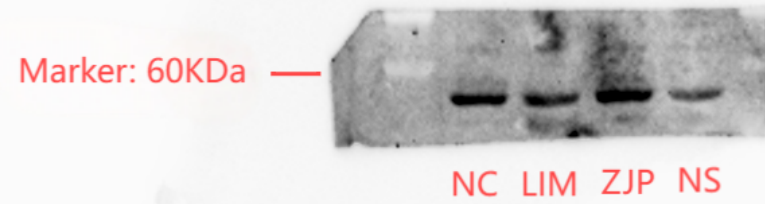

Fig 6B NOS2-1

Marker: 130KDa

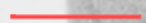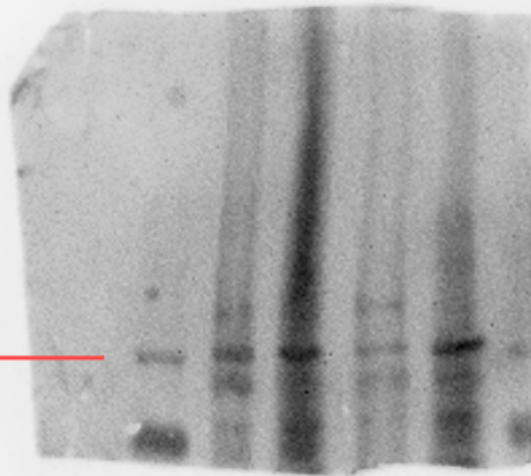

NC LIM ZJP NS

Fig 6B NOS2-2

Marker: 130KDa ———

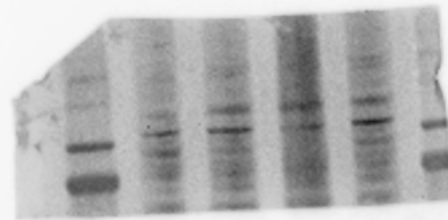

NC LIM ZJP NS

Fig 6B NOS2-3

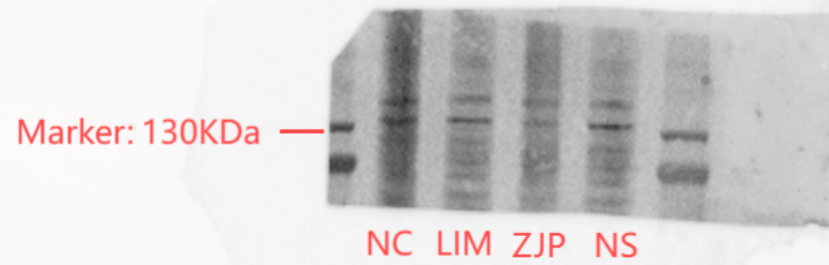

Fig 6B CHRNA7-1

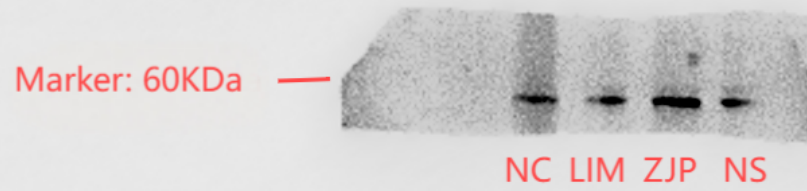

Fig 6B CHRNA7-2

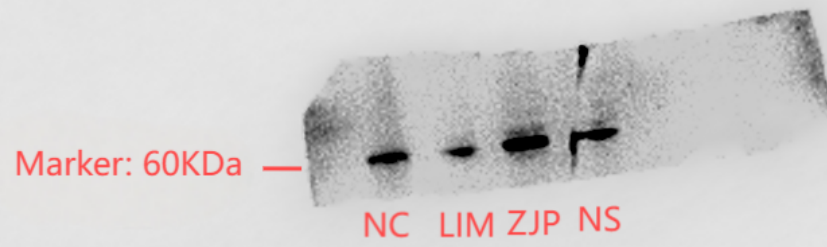



Fig 6B CHRNA7-3

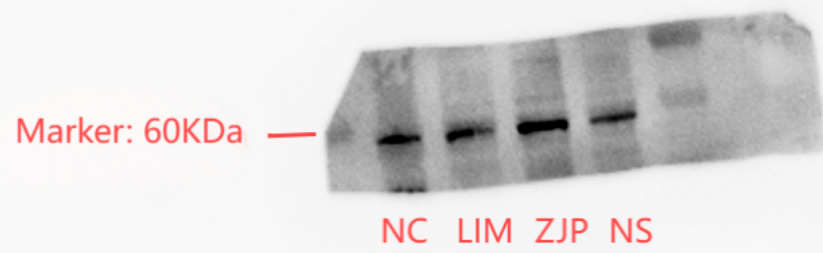

Fig 6B GAPDH-1

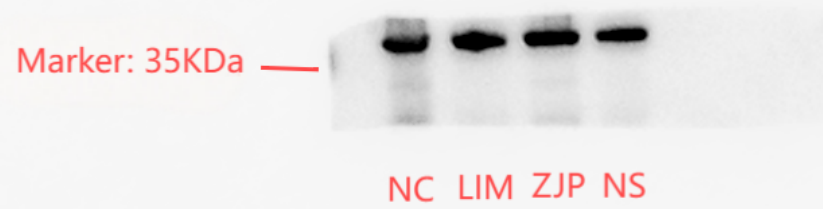

Fig 6B GAPDH-2

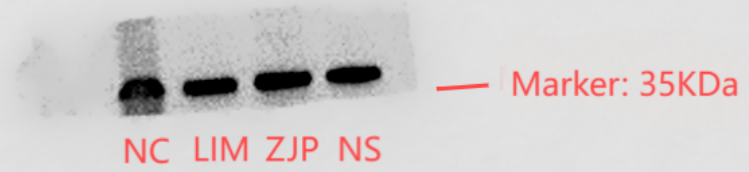

Fig 6B GAPDH-3

Marker: 35KDa

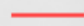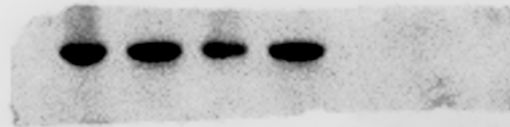

NC LIM ZJP NS
